# Supplementary material for: Single-Cell Transcriptome Analysis Reveals the Expression Pattern of PDCD10 in Myeloid Cells of Hepatocellular Carcinoma and Its Correlation with Oxidative Stress, Immune Infiltration, and Immunotherapy Prognosis
Source: Research Square preprint supplement (doi:10.21203/rs.3.rs-7375266/v1), 2025-10-08
Supplement: Supplementary file 1 [file statistics.xlsx]

## Sheet: Sheet1
内参基因					目的基因
Sample Name	Target Name	CT Value	内参Ct值均数		Sample Name	Target Name	CT Value	ΔCT＝目的基因CT-内参CT均数	平均值	ΔΔCT＝目的基因ΔCT-对照组ΔCT	2-ΔΔCT
control	actin	22.245	22.325		control	PDCD10	25.345	3.02	3.165	-0.145	1.10573
control	actin	22.365	22.325		control	PDCD10	25.647	3.322	3.165	0.157	0.896888
control	actin	22.365	22.325		control	PDCD10	25.478	3.153	3.165	-0.012	1.00835
cancer	actin	22.123	22.2547		癌症	PDCD10	23.245	0.990333	3.165	-2.17467	4.51481
cancer	actin	22.154	22.2547		癌症	PDCD10	22.365	0.110333	3.165	-3.05467	8.30895
cancer	actin	22.487	22.2547		癌症	PDCD10	22.478	0.223333	3.165	-2.94167	7.68298
